# Supplementary material for: Serum, liver and bile sitosterol and sitostanol in obese patients with and without NAFLD
Source: PubMed Central journal article supplement (PMC5968183; doi:10.1042/bsr20171274), 2018-04-20

## **Serum, liver and bile sitosterol and sitostanol in obese patients with and without NAFLD**

Tauriainen Milla-Maria, Männistö Ville, Kaminska Dorota, Maija Vaittinen, Kärjä Vesa, Käckelä Pirjo, Venesmaa Sari, Gylling Helena, Pihlajamäki Jussi

### **Table of contents**

|                             |     |
|-----------------------------|-----|
| Supplementary Table 1 ..... | 2   |
| Supplementary Table 2 ..... | 3   |
| Supplementary Table 3 ..... | 4   |
| Supplementary Table 4 ..... | 5   |
| Supplementary Table 5 ..... | 6-8 |
| Supplementary Fig 1.....    | 9   |

Supplementary Table 1. Sequences of qPCR primers.

| Gene          | Forward primer<br>(5' – 3') | Reverse primer<br>(5' – 3') |
|---------------|-----------------------------|-----------------------------|
| <i>NPC1L1</i> | TACTGTGCCAATGCCCCGCT        | GGGAAGACAGGGGCCCCGTA        |
| <i>ABCG5</i>  | TTCATCTTTGACCCCCGGA         | GATGTGATGTCCCACCAGGG        |
| <i>ABCG8</i>  | GGAACCTGGAGGGAACAATAAC      | GGCATCTTGCTGGTACATCTT       |
| <i>RPLP0</i>  | GGCGACCTGGAAGTCCAAC         | CCATCAGCACACAGCCTTC         |

Supplementary Table 2. Clinical characteristics (mean±SD) of study subjects in groups that had plant sterol and plant stanol measurement available from serum, liver and bile and had either histologically normal liver or NAFLD. \*P<0.05 compared to those with serum measurements. DPI (dietary phytosterol intake, serum campesterol to cholestanol ratio).

|                                      | <b>Serum</b> | <b>Liver</b> | <b>Bile</b> | <b>P<br/>serum<br/>vs. liver</b> | <b>P<br/>serum<br/>vs. bile</b> |
|--------------------------------------|--------------|--------------|-------------|----------------------------------|---------------------------------|
|                                      | <b>138</b>   | <b>38</b>    | <b>39</b>   |                                  |                                 |
| Gender (male/female)                 | 38/100       | 14/24        | 9/30        | 0.133                            | 0.463                           |
| Age (years)                          | 46.3±8.9     | 45.8±9.1     | 48.2±9.0    | 0.746                            | 0.180                           |
| Body mass index (kg/m <sup>2</sup> ) | 43.3±6.9     | 43.8±5.2     | 41.6±4.9    | 0.662                            | <b>0.021</b>                    |
| ALT (U/L)                            | 49.6±33.4    | 49.9±42.1    | 48.4±30.0   | 0.629                            | 0.903                           |
| Fasting glucose (mmol/L)             | 6.5±1.9      | 6.3±1.1      | 6.4±1.7     | 0.604                            | 0.932                           |
| Fasting insulin (mU/L)               | 18.6±10.1    | 18.5±10.5    | 18.8±9.5    | 0.694                            | 0.673                           |
| Total cholesterol (mmol/L)           | 4.5±0.9      | 4.3±1.0      | 4.5±0.7     | <b>0.031</b>                     | 0.301                           |
| HDL cholesterol (mmol/L)             | 1.1±0.3      | 1.1±0.3      | 1.2±0.3     | 0.683                            | <b>0.004</b>                    |
| LDL cholesterol (mmol/L)             | 2.7±0.8      | 2.5±0.8      | 2.6±0.7     | 0.085                            | 0.849                           |
| Triglycerides (mmol/L)               | 1.3±0.5      | 1.3±0.5      | 1.7±0.9     | 0.166                            | 0.898                           |
| DPI (dietary phytosterol intake)     | 1.0±0.4      | 0.9±0.4      | 1.0±0.5     | 0.577                            | 0.526                           |

Supplementary Table 3. Spearman correlations of serum, liver and bile plant sterol and sitostanol.  
 \*\*P<0.01 and \*P<0.05. Bile avenasterol and campesterol were undetected.

|                     | <b>Serum</b>   |                |               |            |
|---------------------|----------------|----------------|---------------|------------|
|                     | Campesterol    | Sitosterol     | Avenasterol   | Sitostanol |
| <b>Liver (n=38)</b> | <b>0.544**</b> | <b>0.488**</b> | <b>0.517*</b> | 0.214      |
| <b>Bile (n=41)</b>  |                | <b>0.795**</b> |               | 0.236      |

Supplementary Table 4. Spearman correlations of liver mRNA gene expression (qPCR assay) with plant sterols and sitostanol ratios to cholesterol in serum, liver and bile. \*P<0.05.

|                      | <i>NPC1L1</i>  | <i>ABCG5</i>  | <i>ABCG8</i>   |
|----------------------|----------------|---------------|----------------|
| <b>SERUM (n=102)</b> |                |               |                |
| Campesterol          | -0.112         | -0.042        | -0.090         |
| Sitosterol           | <b>-0.210*</b> | -0.069        | -0.172         |
| Avenasterol          | -0.046         | 0.117         | -0.110         |
| Sitostanol           | <b>0.248*</b>  | <b>0.243*</b> | -0.016         |
| <b>LIVER (n=38)</b>  |                |               |                |
| Campesterol          | -0.059         | 0.027         | -0.194         |
| Sitosterol           | -0.168         | -0.073        | -0.310         |
| Avenasterol          | 0.133          | -0.025        | <b>-0.383*</b> |
| Sitostanol           | 0.215          | 0.190         | 0.012          |
| <b>BILE (n=41)</b>   |                |               |                |
| Sitosterol           | -0.295         | -0.138        | -0.209         |
| Sitostanol           | 0.227          | 0.247         | 0.376          |

Supplementary Table 5. Correlations of the inflammation, lipid and cholesterol metabolism associated genes (liver mRNA expression, qPCR assay) with sitosterol and sitostanol ratios to cholesterol in serum (n=102), liver (n=38) and bile (n=41). \*P<0.05, \*\*P<0.009 in bold. Spearman`s correlation analysis. N/A: data not available.

| Inflammation-related genes                                             |                    | Serum n=102            |                | Liver n=38     |               | Bile=41       |               |
|------------------------------------------------------------------------|--------------------|------------------------|----------------|----------------|---------------|---------------|---------------|
|                                                                        |                    | Sitosterol             | Sitostanol     | Sitosterol     | Sitostanol    | Sitosterol    | Sitostanol    |
| Gene name                                                              | Gene symbol        | 10**2 mmol/mol of chol |                | ug/100 mg chol |               | ug/100mg chol |               |
| ADAM Metallopeptidase Domain 8                                         | <i>ADAM8</i>       | -0,036                 | -0,069         | -0,281         | 0,309         | 0,088         | -0,211        |
| Apoptotic Peptidase Activating Factor 1                                | <i>APAF1</i>       | <b>,199*</b>           | 0,054          | 0,174          | <b>-,394*</b> | 0,227         | -0,008        |
| BCL2-Associated Agonist of Cell Death                                  | <i>BAD</i>         | -0,187                 | <b>-,205*</b>  | -0,088         | 0,065         | <b>-,368*</b> | 0,050         |
| BCL2-Associated Athanogene 6                                           | <i>BAG6</i>        | 0,008                  | <b>-,386**</b> | -0,262         | 0,064         | -0,146        | -0,200        |
| B-Cell CLL/Lymphoma 3                                                  | <i>BCL2</i>        | 0,034                  | 0,070          | -0,185         | 0,243         | 0,067         | 0,178         |
| Complement Component 3                                                 | <i>C3</i>          | -0,105                 | <b>-,348**</b> | -0,299         | -0,013        | -0,069        | -0,107        |
| Caspase 1, Apoptosis-Related Cysteine Peptidase                        | <i>CASP1</i>       | -0,008                 | 0,036          | -0,255         | 0,203         | -0,020        | -0,077        |
| Caspase 3, Apoptosis-Related Cysteine Peptidase                        | <i>CASP3</i>       | -0,116                 | -0,001         | 0,043          | 0,043         | -0,096        | 0,020         |
| Caspase 8, Apoptosis-Related Cysteine Peptidase                        | <i>CASP8</i>       | 0,080                  | -0,165         | -0,114         | -0,091        | 0,013         | -0,139        |
| Caspase 9, Apoptosis-Related Cysteine Peptidase                        | <i>CASP9</i>       | -0,013                 | <b>-,306**</b> | -0,323         | 0,044         | 0,277         | -0,102        |
| Chemokine (C-C Motif) Ligand 2                                         | <i>CCL2</i>        | 0,130                  | 0,142          | 0,202          | -0,133        | 0,079         | -0,173        |
| CD68 Molecule                                                          | <i>CD68</i>        | -0,040                 | -0,039         | -0,275         | 0,120         | -0,147        | 0,273         |
| C-Reactive Protein, Pentraxin-Related                                  | <i>CRP</i>         | -0,092                 | -0,020         | -0,188         | 0,206         | -0,022        | -0,014        |
| Egf-Like Module Containing, Mucin-Like, Hormone Receptor-Like 1        | <i>EMR1=ADGRE1</i> | 0,041                  | -0,024         | 0,085          | 0,105         | -0,054        | 0,060         |
| Fas (TNFRSF6)-Associated Via Death Domain                              | <i>FADD</i>        | 0,153                  | -0,017         | 0,042          | -0,001        | 0,130         | -0,170        |
| Fas Cell Surface Death Receptor                                        | <i>FAS</i>         | <b>,238*</b>           | -0,030         | 0,064          | -0,011        | -0,036        | -0,249        |
| Guanylate Binding Protein 5                                            | <i>GBP5</i>        | -0,151                 | -0,009         | -0,163         | -0,117        | -0,276        | 0,049         |
| Heme Oxygenase 1                                                       | <i>HMOX1</i>       | 0,025                  | 0,008          | -0,024         | 0,282         | -0,139        | <b>,359*</b>  |
| Interleukin 10                                                         | <i>IL10</i>        | -0,032                 | 0,167          | -0,119         | 0,266         | 0,310         | 0,294         |
| Interleukin 18                                                         | <i>IL18</i>        | 0,041                  | -0,146         | -0,144         | 0,116         | -0,065        | 0,264         |
| Interleukin 1, Beta                                                    | <i>IL1B</i>        | -0,106                 | -0,068         | -0,217         | <b>,389*</b>  | -0,027        | -0,162        |
| Interleukin 1 Receptor, Type I                                         | <i>IL1R1</i>       | 0,034                  | -0,125         | -0,147         | -0,172        | 0,151         | 0,016         |
| Interleukin 1, Receptor, Type II                                       | <i>IL1RN</i>       | -0,175                 | 0,066          | -0,332         | 0,153         | 0,028         | 0,029         |
| Interleukin 2                                                          | <i>IL2</i>         | -0,040                 | 0,067          | -0,043         | -0,216        | 0,025         | 0,041         |
| Interleukin 32                                                         | <i>IL32</i>        | -0,116                 | 0,077          | -0,281         | <b>,528**</b> | -0,062        | 0,003         |
| Interleukin 6                                                          | <i>IL6</i>         | -0,015                 | 0,007          | N/A            | N/A           | 0,047         | 0,219         |
| Integrin, Alpha M (Complement Component 3 Receptor 3 Subunit)          | <i>ITGAM</i>       | -0,018                 | -0,125         | <b>-,437**</b> | <b>,507**</b> | 0,120         | -0,040        |
| MHC Class I Polypeptide-Related Sequence A                             | <i>MICA</i>        | 0,069                  | <b>-,240*</b>  | -0,158         | -0,013        | -0,120        | <b>-,321*</b> |
| Matrix Metallopeptidase 9                                              | <i>MMP9</i>        | -0,020                 | -0,010         | -0,088         | 0,163         | 0,116         | 0,191         |
| Nuclear Factor of Kappa Light Polypeptidase Gene Enhancer in B-Cells 1 | <i>NFKB1</i>       | -0,019                 | 0,104          | -0,016         | 0,239         | -0,168        | -0,235        |
| nlr Family, Pyrin Domain Containing 3                                  | <i>NLRP3</i>       | -0,144                 | 0,077          | 0,111          | -0,129        | -0,180        | -0,055        |
| Platelet Derived Growth Factor Beta Polypeptidase                      | <i>PDGFB</i>       | -0,052                 | <b>-,194*</b>  | -0,289         | 0,099         | <b>-,321*</b> | 0,180         |
| PYD and Card Domain Containing                                         | <i>PYCARD</i>      | -0,023                 | 0,023          | 0,104          | -0,031        | -0,116        | 0,236         |
| Receptor (TNFRSF)-Interacting Serine-Threonine Kinase 1                | <i>RIPK1</i>       | <b>,193*</b>           | 0,190          | 0,228          | -0,232        | 0,096         | -0,059        |
| Superoxide Dismutase 2, Mitochondrial                                  | <i>SOD2</i>        | -0,023                 | <b>,210*</b>   | <b>,361*</b>   | -0,119        | -0,148        | 0,056         |
| Signal Transducer and Activator of Transcription 5B                    | <i>STAT5B</i>      | -0,007                 | 0,042          | -0,109         | 0,208         | 0,131         | 0,113         |
| Toll-Like Receptor                                                     | <i>TLR4</i>        | 0,007                  | -0,143         | <b>-,405*</b>  | <b>,391*</b>  | -0,035        | -0,023        |
| Tumor Necrosis Factor Alpha                                            | <i>TNFα</i>        | -0,060                 | 0,038          | -0,158         | 0,191         | -0,172        | 0,051         |
| Tumor Necrosis Factor Receptor Superfamily, Member 1A                  | <i>TNFRSF1A</i>    | 0,069                  | <b>-,213*</b>  | -0,123         | -0,333        | -0,037        | -0,162        |
| Tumor Necrosis Factor Receptor Superfamily, Member 1B                  | <i>TNFRSF1B</i>    | -0,098                 | 0,063          | -0,310         | 0,112         | -0,101        | 0,185         |
| Tumor Necrosis Factor Receptor Superfamily, Member 10                  | <i>TNFRSF10</i>    | -0,008                 | <b>-,372**</b> | -0,159         | -0,290        | 0,112         | -0,076        |
| Tumor Protein 53                                                       | <i>TP53</i>        | -0,032                 | -0,032         | -0,215         | 0,160         | 0,164         | -0,050        |
| TNFRSF1A-Associated Via Death Domain                                   | <i>TRADD</i>       | -0,093                 | <b>-,222*</b>  | 0,025          | 0,055         | -0,086        | -0,002        |
| TNF Receptor-Associated Factor 2                                       | <i>TRAF2</i>       | -0,120                 | -0,088         | -0,278         | 0,012         | -0,305        | 0,027         |
| Thioredoxin Interacting Protein                                        | <i>TXNIP</i>       | 0,017                  | <b>,285**</b>  | 0,193          | 0,126         | 0,070         | 0,245         |

| Lipid metabolism - related genes                              |                     | Serum n=102            |                | Liver n=38     |                | Bile=41       |               |
|---------------------------------------------------------------|---------------------|------------------------|----------------|----------------|----------------|---------------|---------------|
|                                                               |                     | Sitosterol             | Sitostanol     | Sitosterol     | Sitostanol     | Sitosterol    | Sitostanol    |
| Gene name                                                     | Gene symbol         | 10**2 mmol/mol of chol |                | ug/100 mg chol |                | ug/100mg chol |               |
| Peroxisome Proliferator-Activated Receptor Alpha              | <i>PPARA</i>        | -0,045                 | 0,192          | 0,006          | -0,040         | -0,062        | <b>-,365*</b> |
| Peroxisome Proliferator-Activated Receptor Gamma (total)      | <i>PPARG_tot</i>    | -0,086                 | <b>-,273**</b> | <b>-,370*</b>  | -0,036         | -0,270        | -0,057        |
| Peroxisome Proliferator-Activated Receptor Gamma (variant 1A) | <i>PPARGC1A</i>     | 0,082                  | <b>-,302**</b> | -0,286         | -0,155         | -0,033        | 0,086         |
| Peroxisome Proliferator-Activated Receptor Gamma (variant 1B) | <i>PPARGC1B</i>     | <b>-,204*</b>          | <b>-,432**</b> | <b>-,428*</b>  | 0,109          | -0,181        | -0,082        |
| Sterol Regulatory Element Binding Transcription Factor 1      | <i>SREBF1_tot</i>   | -0,072                 | -0,070         | -0,253         | -0,121         | -0,131        | 0,118         |
| ATP Citrate Lyase                                             | <i>ACLY</i>         | -0,006                 | -0,033         | -0,202         | 0,242          | -0,054        | 0,265         |
| Acetyl-CoA Carboxylase Alpha                                  | <i>ACACA=ACC</i>    | -0,093                 | <b>-,271**</b> | -0,300         | -0,025         | 0,045         | -0,108        |
| Fatty Acid Synthetase                                         | <i>FASN</i>         | -0,052                 | 0,004          | -0,072         | 0,247          | -0,101        | 0,269         |
| Fatty Acid Elongase 1                                         | <i>ELOVL1</i>       | -0,069                 | 0,001          | <b>-,414*</b>  | <b>,496**</b>  | -0,125        | 0,122         |
| Fatty Acid Elongase 2                                         | <i>ELOVL2</i>       | -0,047                 | <b>,331**</b>  | 0,118          | 0,321          | 0,049         | 0,300         |
| Fatty Acid Elongase 3                                         | <i>ELOVL3</i>       | 0,062                  | 0,098          | -0,004         | 0,128          | 0,175         | 0,070         |
| Fatty Acid Elongase 4                                         | <i>ELOVL4</i>       | -0,125                 | 0,083          | -0,118         | 0,094          | -0,066        | 0,094         |
| Fatty Acid Elongase 5                                         | <i>ELOVL5</i>       | -0,060                 | <b>,306**</b>  | 0,314          | 0,074          | -0,246        | <b>,352*</b>  |
| Fatty Acid Elongase 6                                         | <i>ELOVL6</i>       | 0,110                  | 0,134          | 0,185          | -0,218         | 0,303         | 0,014         |
| Fatty Acid Elongase 7                                         | <i>ELOVL7</i>       | 0,070                  | -0,043         | -0,244         | 0,152          | -0,048        | 0,015         |
| Stearoyl-CoA Desaturase (Delta-9 Desaturase)                  | <i>SCD</i>          | 0,040                  | -0,174         | -0,202         | 0,095          | 0,007         | 0,054         |
| Fatty Acid Desaturase 1                                       | <i>FADS1</i>        | -0,061                 | 0,022          | 0,109          | 0,332          | -0,291        | -0,128        |
| Fatty Acid Desaturase 2                                       | <i>FADS2</i>        | -0,092                 | -0,064         | -0,018         | 0,306          | -0,207        | -0,083        |
| Fatty Acid Desaturase 3                                       | <i>FADS3</i>        | -0,015                 | <b>-,233*</b>  | 0,011          | 0,095          | -0,234        | -0,152        |
| Carnitine Palmitoyltransferase 1A (Liver)                     | <i>CPT1A</i>        | -0,046                 | 0,170          | -0,161         | <b>,375*</b>   | 0,146         | -0,066        |
| Carnitine Palmitoyltransferase 1B (Muscle)                    | <i>CPT1B</i>        | 0,170                  | 0,164          | -0,201         | 0,228          | 0,128         | 0,156         |
| Glycerol-3 Phosphate Acyltransferase, Mitochondrial           | <i>GPAM=GPAT1</i>   | -0,047                 | -0,063         | -0,303         | 0,183          | -0,031        | 0,164         |
| Glycerol-3 Phosphate Acyltransferase 2, Mitochondrial         | <i>GPAT2</i>        | 0,021                  | -0,147         | -0,272         | 0,276          | -0,082        | -0,100        |
| 1-Acylglycerol-3-Phosphate O-Acyltransferase 1                | <i>AGPAT1</i>       | <b>-,270**</b>         | 0,065          | -0,329         | 0,218          | -0,010        | 0,084         |
| 1-Acylglycerol-3-Phosphate O-Acyltransferase 2                | <i>AGPAT2</i>       | -0,065                 | <b>-,199*</b>  | -0,090         | 0,059          | 0,001         | 0,181         |
| 1-Acylglycerol-3-Phosphate O-Acyltransferase 3                | <i>AGPAT3</i>       | 0,102                  | -0,006         | 0,054          | -0,043         | 0,253         | -0,205        |
| 1-Acylglycerol-3-Phosphate O-Acyltransferase 4                | <i>AGPAT4</i>       | 0,025                  | -0,007         | -0,025         | 0,141          | -0,165        | 0,058         |
| 1-Acylglycerol-3-Phosphate O-Acyltransferase 5                | <i>AGPAT5</i>       | -0,014                 | -0,077         | -0,004         | -0,031         | -0,210        | -0,202        |
| 1-Acylglycerol-3-Phosphate O-Acyltransferase 9                | <i>AGPAT9=GPAT3</i> | 0,008                  | -0,095         | -0,034         | -0,275         | 0,153         | -0,252        |
| 1-Acylglycerol-3-Phosphate O-Acyltransferase 6                | <i>AGPAT6=GPAT4</i> | -0,014                 | <b>-,294**</b> | 0,007          | -0,321         | -0,209        | -0,222        |
| Lipin 1                                                       | <i>LPIN1</i>        | -0,082                 | <b>-,406**</b> | -0,334         | -0,058         | 0,023         | <b>-,340*</b> |
| Lipin 2                                                       | <i>LPIN2</i>        | 0,155                  | <b>-,238*</b>  | 0,133          | <b>-,444**</b> | 0,078         | -0,251        |
| Lipin 3                                                       | <i>LPIN3</i>        | -0,001                 | -0,186         | <b>-,373*</b>  | -0,187         | -0,138        | 0,045         |
| Diacylglycerol O-Acyltransferase 1                            | <i>DGAT1</i>        | <b>-,204*</b>          | 0,047          | -0,278         | 0,174          | -0,127        | -0,110        |
| Diacylglycerol O-Acyltransferase 2                            | <i>DGAT2</i>        | -0,090                 | 0,014          | -0,167         | 0,222          | -0,123        | 0,172         |
| Lipoprotein Lipase                                            | <i>LPL</i>          | 0,000                  | 0,082          | -0,019         | <b>,393*</b>   | 0,179         | -0,091        |
| Patatin-Like Phospholipase Domain Containing 2                | <i>PNPLA2=ATGL</i>  | -0,088                 | -0,010         | -0,270         | 0,048          | 0,038         | -0,111        |
| Lipase, Hormone Sensitive                                     | <i>LIPE=HSL</i>     | 0,056                  | <b>,197*</b>   | -0,071         | -0,013         | 0,062         | -0,169        |
| Perlipin 1                                                    | <i>PLIN1</i>        | -0,005                 | -0,006         | -0,230         | 0,322          | 0,028         | 0,210         |
| Patatin-Like Phospholipase Domain Containing 3                | <i>PNPLA3</i>       | 0,026                  | -0,190         | -0,239         | 0,081          | -0,114        | -0,020        |
| Phospholipid Phosphatase 2A                                   | <i>PPAP2A</i>       | 0,128                  | <b>,318**</b>  | 0,233          | 0,118          | -0,008        | 0,104         |
| Phospholipid Phosphatase 2B                                   | <i>PPAP2B</i>       | -0,135                 | 0,078          | -0,167         | 0,128          | 0,001         | 0,290         |
| Phospholipid Phosphatase 2C                                   | <i>PPAP2C</i>       | 0,120                  | 0,139          | 0,024          | 0,267          | 0,135         | 0,052         |
| Uncoupling Protein 1 (Mitochondrial, Proton Carrier)          | <i>UCP1</i>         | -0,028                 | 0,033          | N/A            | N/A            | -0,137        | -0,094        |
| Uncoupling Protein 2 (Mitochondrial, Proton Carrier)          | <i>UCP2</i>         | <b>-,229*</b>          | -0,049         | -0,179         | <b>,433*</b>   | -0,313        | <b>,343*</b>  |

| Cholesterol metabolism - related genes                       |                    | Serum n=102            |                | Liver n=38     |               | Bile=41       |               |
|--------------------------------------------------------------|--------------------|------------------------|----------------|----------------|---------------|---------------|---------------|
|                                                              |                    | Sitosterol             | Sitostanol     | Sitosterol     | Sitostanol    | Sitosterol    | Sitostanol    |
| Gene name                                                    | Gene symbol        | 10**2 mmol/mol of chol |                | ug/100 mg chol |               | ug/100mg chol |               |
| Nuclear Receptor Subfamily 1, Group H, Member 2              | <i>NR1H2=LXRB</i>  | -0,077                 | <b>-,201*</b>  | -0,125         | 0,122         | -0,203        | 0,219         |
| Sterol Regulatory Element Binding Transcription Factor 2     | <i>SREBF2</i>      | -0,105                 | -0,052         | -0,029         | <b>,354*</b>  | -0,135        | 0,205         |
| Acyl-CoA Synthetase Short-Chain Family Member 2              | <i>ACSS2</i>       | -0,013                 | -0,022         | -0,060         | 0,186         | -0,181        | -0,122        |
| Acetyl-CoA Acetyltransferase 1                               | <i>ACAT1</i>       | -0,048                 | 0,143          | -0,050         | 0,263         | 0,090         | 0,228         |
| 3-Hydroxy-3-Methylglutaryl-CoA Synthetase 1 (Soluble)        | <i>HMGCS1</i>      | 0,046                  | 0,055          | 0,230          | 0,179         | 0,191         | 0,155         |
| 3-Hydroxy-3-Methylglutaryl-CoA Synthetase 3 (Mitochondrial)  | <i>HMGCS2</i>      | -0,084                 | <b>,285**</b>  | -0,169         | -0,016        | -0,078        | 0,180         |
| 3-Hydroxy-3-Methylglutaryl-CoA Reductase                     | <i>HMGCR</i>       | -0,135                 | <b>-,213*</b>  | -0,117         | 0,091         | 0,037         | 0,219         |
| Farnesyl-Diphosphate Farnelystransferase 1                   | <i>FDFT1</i>       | -0,004                 | -0,112         | -0,018         | 0,219         | -0,018        | -0,145        |
| Squalene Epoxidase                                           | <i>SQLE</i>        | -0,074                 | -0,100         | -0,042         | 0,308         | 0,002         | 0,063         |
| Lanosterol Synthetase (2,3-Oxidosqualene-Lanosterol Cyclase) | <i>LSS</i>         | -0,019                 | -0,112         | -0,107         | 0,191         | -0,200        | <b>-,324*</b> |
| Transmembrane 7 Superfamily Member 2                         | <i>TM7SF2</i>      | 0,003                  | -0,011         | 0,068          | 0,159         | -0,067        | -0,199        |
| Emopamil Binding Protein (Sterol Isomerase)                  | <i>EBP</i>         | 0,125                  | <b>-,233*</b>  | -0,042         | -0,134        | 0,104         | <b>-,331*</b> |
| Methylsterol Mono-oxygenase 1                                | <i>MSMO1=SC4MO</i> | -0,101                 | -0,030         | 0,157          | -0,127        | -0,046        | -0,035        |
| Sterol C5-Desaturase                                         | <i>SC5DL</i>       | -0,023                 | <b>,232*</b>   | 0,151          | 0,050         | -0,062        | 0,094         |
| 24-Dehydrocholesterol Reductase                              | <i>DHCR24</i>      | <b>-,237*</b>          | -0,127         | -0,150         | -0,110        | 0,068         | 0,057         |
| 7-Dehydrocholesterol Reductase                               | <i>DHCR7</i>       | -0,124                 | <b>,224*</b>   | -0,083         | <b>,569**</b> | 0,122         | 0,143         |
| ATP-Binding Cassette, Sub-Family A (ABC1), Member 1          | <i>ABCA1</i>       | -0,076                 | <b>-,287**</b> | <b>-,366*</b>  | -0,026        | -0,031        | -0,007        |
| ATP-Binding Cassette, Sub-Family G (WHITE), Member 1         | <i>ABCG1</i>       | 0,006                  | -0,073         | -0,207         | 0,060         | 0,028         | -0,034        |
| ATP-Binding Cassette, Sub-Family G (WHITE), Member 5         | <i>ABCG5</i>       | -0,069                 | <b>,243*</b>   | -0,073         | 0,190         | -0,138        | 0,190         |
| ATP-Binding Cassette, Sub-Family G (WHITE), Member 8         | <i>ABCG8</i>       | -0,172                 | -0,016         | -0,310         | 0,012         | -0,209        | 0,146         |
| Niemann-Pick C1-Like 1                                       | <i>NPC1L1</i>      | <b>-,210*</b>          | <b>,248*</b>   | -0,168         | 0,215         | -0,295        | 0,227         |
| Low Density Lipoprotein Receptor                             | <i>LDLR</i>        | -0,009                 | -0,030         | 0,045          | 0,005         | 0,057         | -0,244        |
| Proprotein Convertase Subtilisin/Kexin Type 9                | <i>PCSK9</i>       | <b>-,200*</b>          | 0,005          | -0,186         | 0,047         | -0,038        | -0,026        |
| 3-Oxoacid CoA Transferase 1                                  | <i>OXCT1</i>       | -0,011                 | 0,127          | -0,249         | 0,201         | 0,062         | 0,301         |
| 3-Hydroxybutyrate Dehydrogenase, Type 1                      | <i>BDH1</i>        | -0,102                 | <b>,229*</b>   | -0,119         | 0,120         | 0,013         | 0,026         |
| Scavenger Receptor Class B, Member 1                         | <i>SCARB1=SRB1</i> | -0,128                 | 0,024          | -0,139         | 0,116         | -0,158        | 0,149         |
| Fibroblast Growth Factor 21                                  | <i>FGF21</i>       | -0,047                 | -0,135         | -0,222         | 0,111         | 0,205         | <b>,347*</b>  |
| Cytocrome P450, Family 51, Subfamily A, Polypeptide 1        | <i>CYP51A1</i>     | 0,066                  | <b>,196*</b>   | 0,188          | 0,157         | 0,032         | <b>-,321*</b> |



Supplementary Figure. 1. Serum plant sterols and sitostanol ratios to cholesterol (mean  $\pm$  SD) in individuals with normal liver (n=44) and NAFLD (n=94). Serum campesterol, sitosterol, avenasterol or sitostanol were not different between normal liver and NAFLD.

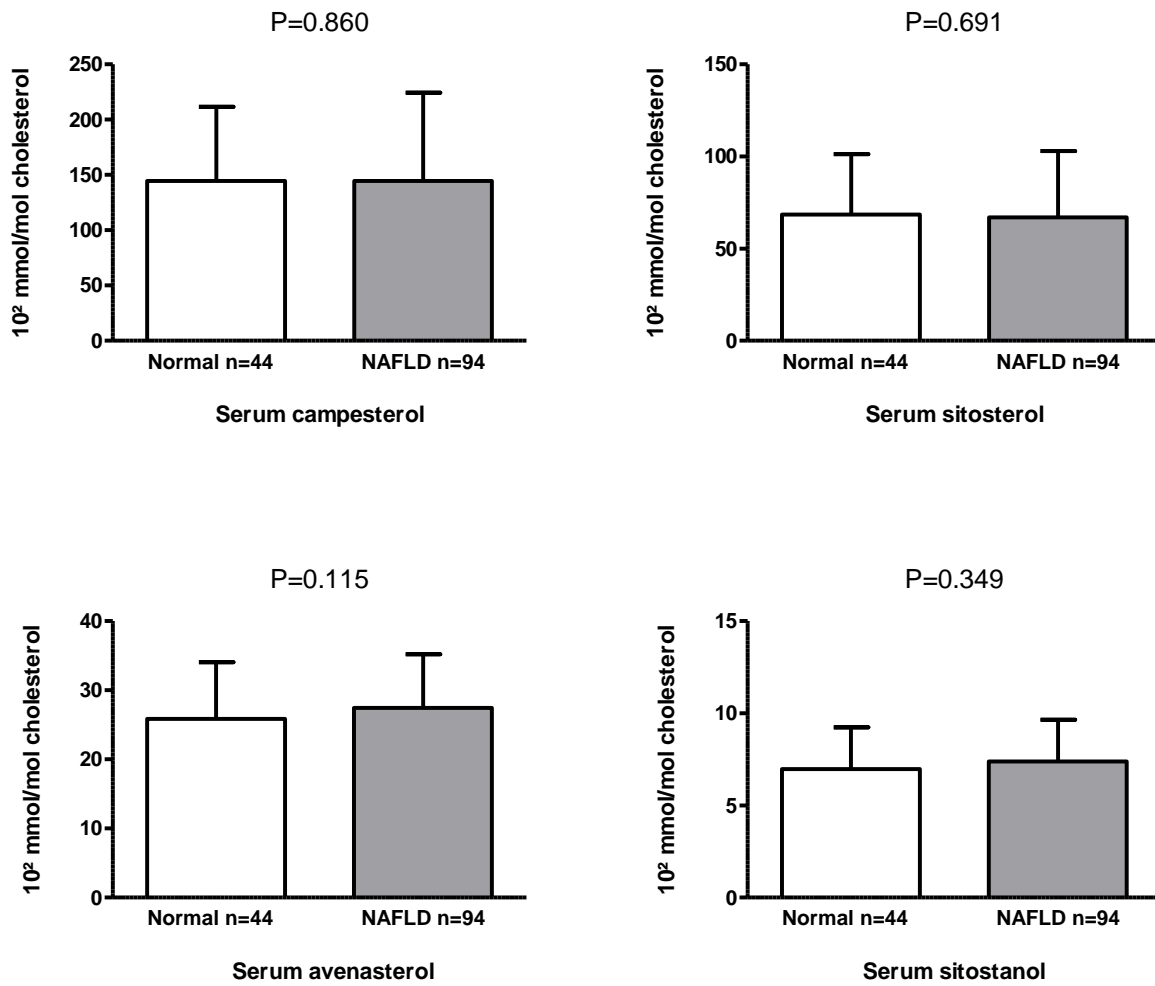

Supplement: bsr20171274_Supp1.pdf [file bsr20171274_Supp1.pdf]
